# Supplementary material
Source: MDPI journal article supplement (https://www.mdpi.com/2073-445X/7/1/32)

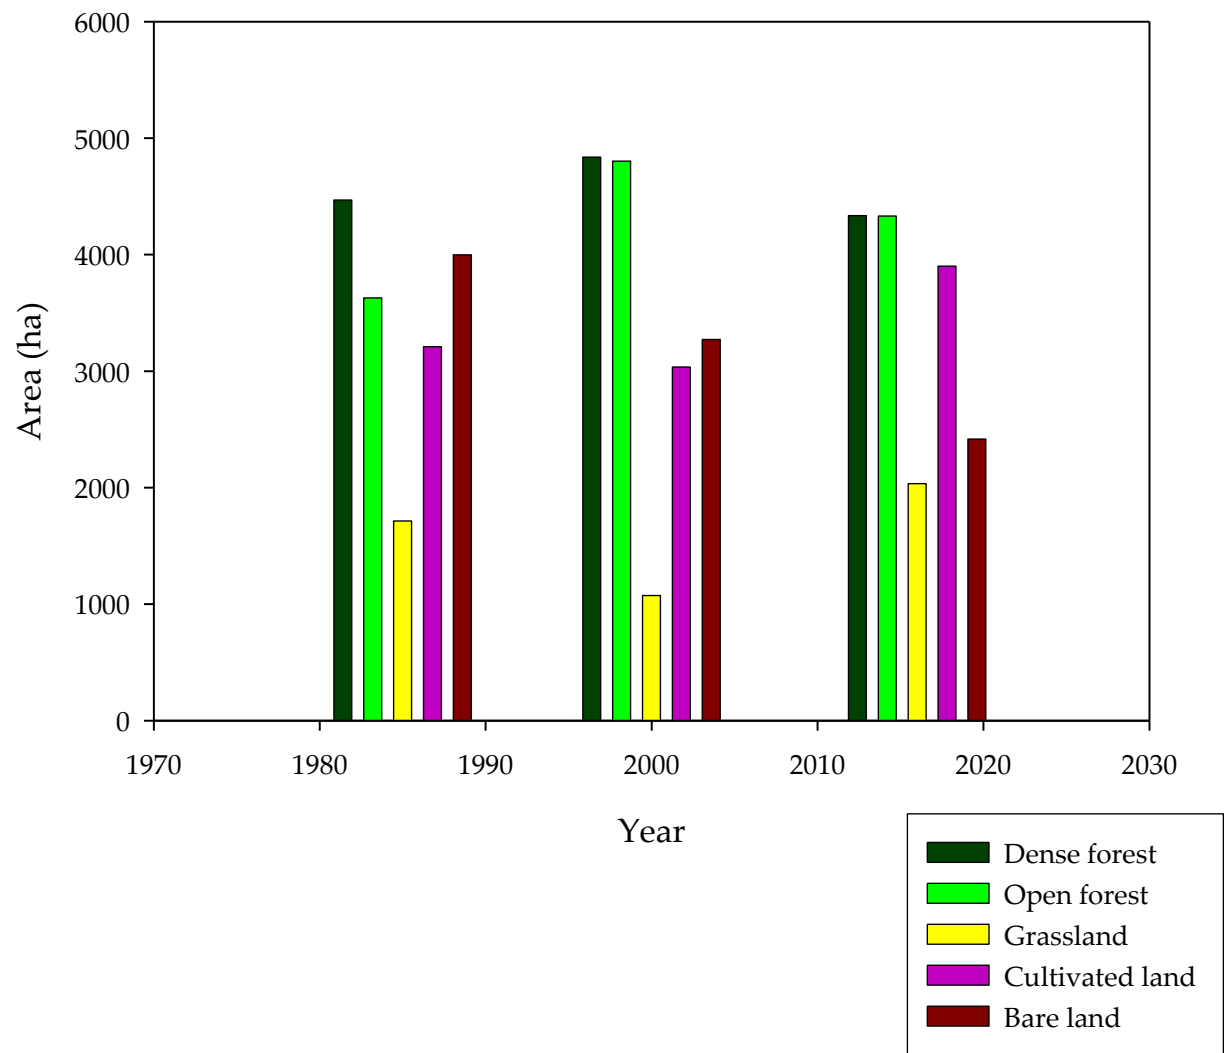

Figure S2: Land cover changes during 1985–2016.

Supplement: s1 [file s1]

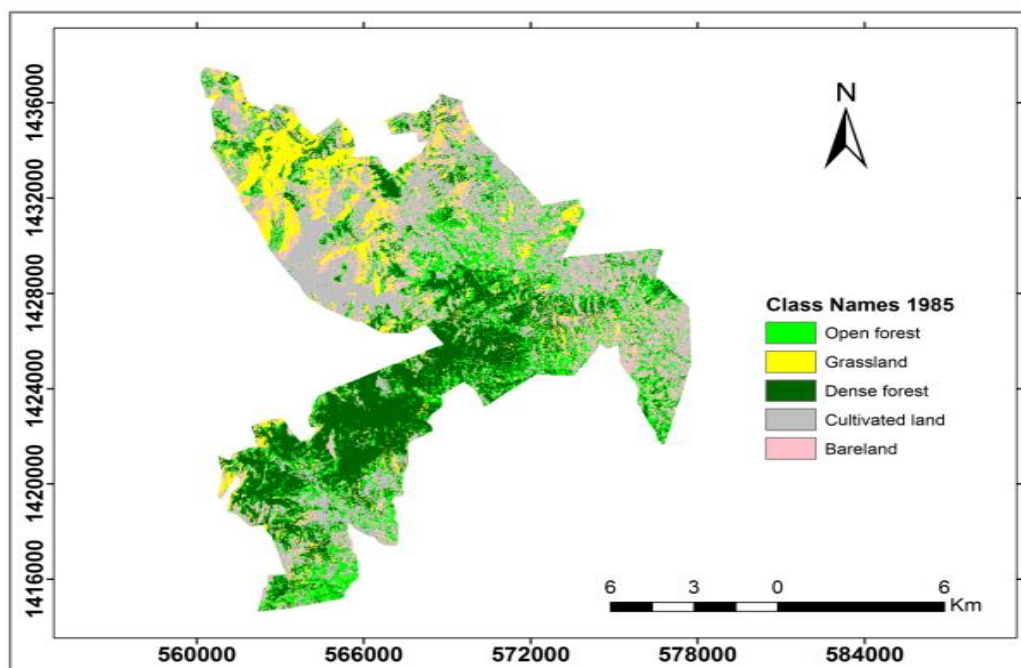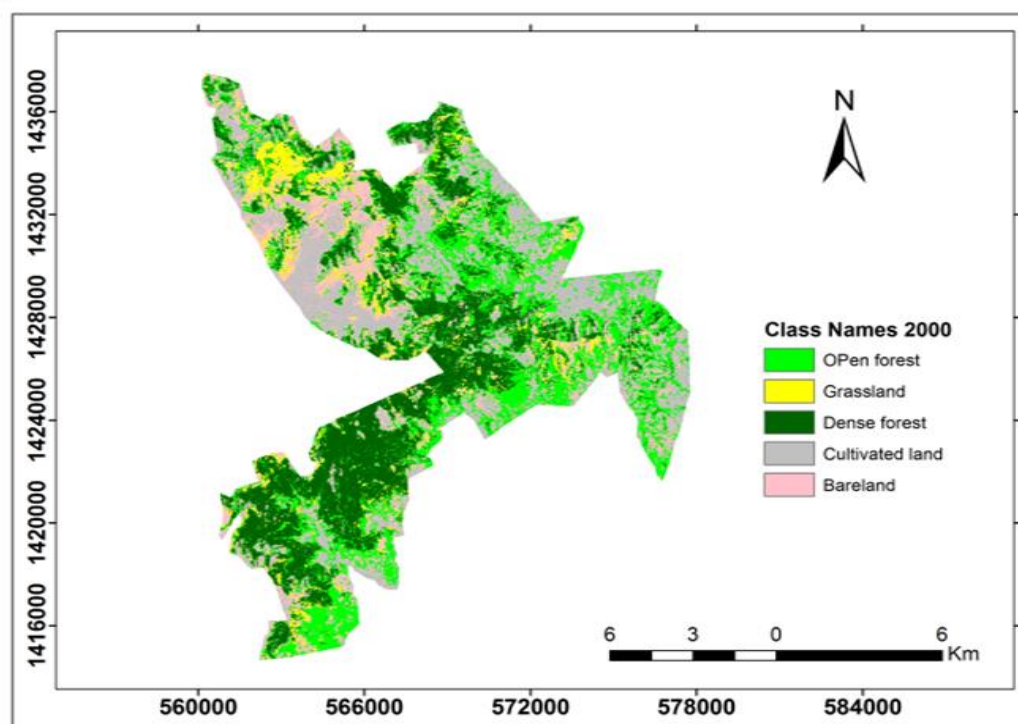

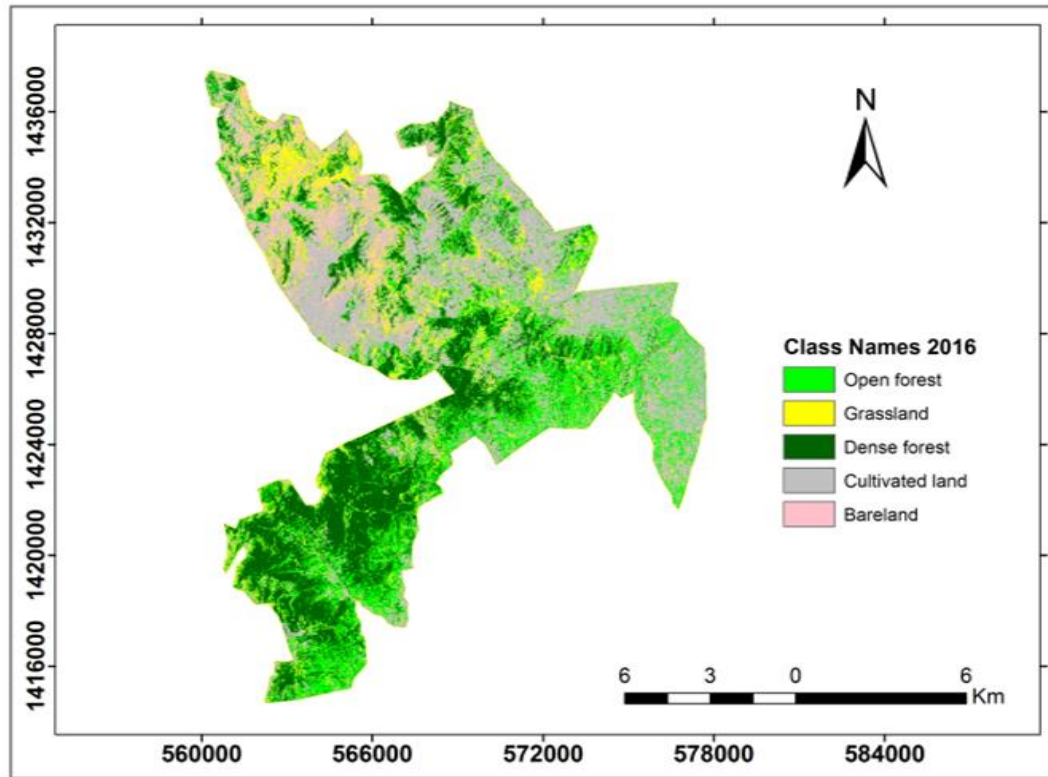

**Figure S1.** A comparative map showing the actual land cover change in Wujig Mahgo Waren (WMW) in 1985, 2000 and 2016

Supplement: s1 [file s1]
